# Supplementary material
Source: HighWire-hosted journal article supplement (https://bmjopen.bmj.com/content/14/5/e082137)
Supplement: inline-supplementary-material-1 [file inline-supplementary-material-1.pdf]

## Survey and Interview Guide for GP registrars.

### Survey for GP registrars:

1.Which category includes your age?

18-24  
25-34  
35-44  
45-54  
55-64  
65+

2.What is your gender?

Male  
Female  
Other

3.Which category best describes the number of years you are post-graduate from medical school?

1-4  
5-7  
8-10  
11-15  
16-20  
21-25  
> 25

4.Which of the following categories best describes your general practice position?

Intern or resident  
AGPT registrar  
Non-AGPT registrar  
Non-VR General practitioner  
Vocationally registered general practitioner

4a. What college are you training with or hold fellowship with?

RACGP  
ACRRM  
Both  
Don't know  
Not applicable

4b. What is your current stage of GP training?

Hospital / Core generalist  
First year GP training  
Second year GP training  
Advanced skill training

4c. What university did you complete your medical degree through?

James Cook University  
Griffith University  
University of Queensland  
Bond University  
Other Australian University: \_\_\_\_\_  
Overseas University: \_\_\_\_\_  
Prefer not to say

4d. My medical degree was:

Undergraduate  
Post-graduate – Yes, progress to 4e

4e. What was your undergraduate degree: \_\_\_\_\_

4f. What is the nature of your current main practice? (Choose all that apply).

Hospital based  
General practice based  
Aboriginal Health or Medical Service  
Other

4g. What is the postcode of your current main workplace? \_\_\_\_\_

5.How long have you lived in Australia?

0- 5 years  
  
6-10 years  
11-15 years  
>15 years  
All of my life

6.During your practicing career, approximately how much time have your worked in a setting with mostly Aboriginal and Torres Strait Islander patients?

Nil  
<6 months  
7-12 months  
1-3 years  
4-6 years  
7-10 years  
11-15 years  
16-20 years  
21-25 years  
> 25 years

Questionnaire for GP registrars:

| Item   | Item definition                                                    |
|--------|--------------------------------------------------------------------|
| CST*Q1 | I think my beliefs and attitudes are influenced by my culture.     |
| CSTQ2  | A GPs’ own cultural beliefs influence their health care decisions. |

|        |                                                                                                                                                                |
|--------|----------------------------------------------------------------------------------------------------------------------------------------------------------------|
| CSTQ3  | Time in the GP curriculum devoted to the promotion of * self-awareness and well-being is time well spent.                                                      |
| CSTQ4  | A GPs' ability to communicate with patients is as important as their ability to solve clinical problems.                                                       |
| CSTQ5  | The presence of more than two family members in a GP consultation is disruptive to staff and should be limited or restricted.                                  |
| CSTQ6  | The quality of patient care could possibly be compromised if a GP is oblivious to the family's cultural attributes and values.                                 |
| CSTQ7  | As a GP if I needed more information about a person's culture to provide a service, I would feel comfortable asking the person or one of their family members. |
| CSTQ8  | Aboriginal and Torres Strait Islander people, due to the own cultural beliefs and values, have the poorest health status in Australia.                         |
| CSTQ9  | Aboriginal and Torres Strait Islander people, should be responsible for improving their own health.                                                            |
| CSTQ10 | The Western medical model is sufficient in meeting the health needs of all people including Aboriginal and Torres Strait Islander peoples.                     |
| CSTQ11 | All Australians need to understand Aboriginal and Torres Strait Islander history and culture.                                                                  |
| CSTQ12 | Aboriginal and Torres Strait Islander people should not have to change their culture just to fit in.                                                           |
| CSTQ13 | We practice equity in the provision of healthcare by treating Aboriginal and Torres Strait Islander people the same as all other patients.                     |
| CSTQ14 | I need to think beyond the individual when considering Aboriginal and Torres Strait Islander health issues.                                                    |
| CSTQ15 | I have a social responsibility to work for changes in Aboriginal and Torres Strait Islander health.                                                            |
| W*1    | History does not impact on Aboriginal and Torres Strait Islander health.                                                                                       |
| W2     | Understanding Aboriginal and Torres Strait Islander peoples' history will inform my practice as a GP.                                                          |
| W3     | Understanding Aboriginal and Torres Strait Islander peoples' social practices will not apply to my practice.                                                   |
| W4     | I find it difficult to understand the beliefs of different cultural groups.                                                                                    |
| W5     | Evidence from research can help me in my practice in Aboriginal and Torres Strait Islander peoples' health.                                                    |
| W6     | Aboriginal and Torres Strait Islander peoples receive unnecessary special treatment from government.                                                           |

CST\* – selected questions from Ryder et al (1) measure of attitude change.

W\* – selected questions from West et al (2) cultural capability measurement tool.

(Modifications to original surveys:

Throughout the survey the term:

- health professional is replaced with GP throughout the survey.
- Aboriginal people is broadened to Aboriginal and Torres Strait Islander people
- patient is used instead of client

CSTQ3 - \*the word student is deleted

CSTQ5 – “GP consultation” used instead of “hospitalised patient’s room”. “Prohibited” replace with “limited or restricted”.

CSTQ9 – Modified from “should take more individual responsibility” to “should be responsible”

W6 – Unnecessary added)

## Interview Guide GP registrars exploring what is distinctive to consultations with Aboriginal and Torres Strait Islander patients

Note: If registrars have not commenced GP training or have not consulted any Aboriginal and Torres Strait Islander patients the wording in brackets may be substituted.

To start this interview, could you please tell me why do you think Aboriginal and Torres Strait Islander patients choose (would choose) to see you as their doctor?

Can you describe Aboriginal and Torres Strait Islander patients for me please?

Prompt: Tell me about your Aboriginal and Torres Strait Islander patients. What are they like? Do you feel they are different to your non-Indigenous patients?

What are the most important things you do (could do) to make Aboriginal and Torres Strait Islander patients feel culturally safe when you are consulting?

What is (would be) your communication strategy in consultations with Aboriginal and Torres Strait Islander patients?

Probe: How do you start your consultation with Aboriginal and Torres Strait Islander patients?

How do you (would you) describe your consultation approach to Aboriginal and Torres Strait Islander patients?

Do you (would you) use a particular model of consultations?

Do you modify this model in any way for Aboriginal and Torres Strait Islander patients?

Is this different to your approach with patients who do not identify as Aboriginal and Torres Strait Islander?

How do you provide emotional support for your Aboriginal and Torres Strait Islander patients?

Can you describe a time when you feel a patient may have felt culturally unsafe when you were consulting?

Can you describe any occasions when you felt uncomfortable with your Aboriginal and Torres

Strait Islander patients?

What does a culturally safe GP consultation look like to you?

How do you demonstrate respect for your Aboriginal and Torres Strait Islander patients?

On a scale of 1-5, how important are the following when consulting with Aboriginal and

Torres Strait Islander patients:

The inclusion of spirituality

Including family, elders, or significant others

The use of silence

Eye contact

Your knowledge of Australia pre-colonisation

Your knowledge of the experiences of Aboriginal and Torres Strait Islander people  
after colonisation

Your medical/clinical knowledge and skills

Learning and using some traditional language

On a scale of 1-5, how important is:

Your culture to you and your identity

Connection to land

What tips/tricks/words of wisdom would you like to give to medical students to improve the  
way they consult with Aboriginal and Torres Strait Islander patients?

Do you have anything else you want to add?

## References:

1. Ryder C, MacKean T, Ullah S, Burton H, Halls H, McDermott D, et al. Development and validation of a questionnaire to measure attitude change in health professionals after completion of an Aboriginal health and cultural safety training programme. *Australian Journal of Indigenous Education*. 2019;48(1):24-38.
2. West R, Mills K, Rowland D, Creedy DK. Validation of the first peoples cultural capability measurement tool with undergraduate health students: a descriptive cohort study. *Nurse Educ Today*. 2018;64:166-71.
